# Supplementary material for: Centromere repositioning causes inversion of meiosis and generates a reproductive barrier
Source: PubMed Central journal article supplement — Proc Natl Acad Sci U S A. 2019 Oct 9;116(43):21580–91. doi: 10.1073/pnas.1911745116 (PMC6815110; doi:10.1073/pnas.1911745116), 2019-10-09
Supplement: pnas.1911745116.sapp.pdf [file pnas.1911745116.sapp.pdf]

## **Supplementary Information for**

### **Centromere repositioning causes inversion of meiosis and generates a reproductive barrier**

Min Lu, Xiangwei He\*

Correspondence to: [xhe@zju.edu.cn](mailto:xhe@zju.edu.cn)

#### **This PDF file includes:**

- SI Materials and Methods
- Figs. S1 to S9
- Tables S1 to S5
- References for SI reference citations

## SI Materials and Methods

**Strain Constructions.** All *S. pombe* strains used in this study are listed in SI Appendix, Table S5. Single inner kinetochore deletion strains (e.g., *fta6Δ*, *cnp3Δ* and *mhf2Δ*) are from the commercial Bionner *S. pombe* deletion library (1). The double-mutant *cnp3Δfta6Δ* strains were obtained from genetic crossing between *fta6Δ* and *cnp3Δ*. The strains carrying both a neocentromere (or Cnp1 spreading) and the *otr1R::ura4* marker were obtained by crossing the *otr1R::ura4* marker strains (strain SPT999a or SPKY10) with strains carrying different neocentromeres (*mhf2<sup>+</sup>cen2<sup>inactive</sup>*, *mhf2Δcen1<sup>inactive</sup>* or *mhf2<sup>+</sup>cen1<sup>inactive</sup>*). Construction of heterozygous gene deletion diploid strains and recovery of their meiotic haploid progeny were performed following standard procedures (2).

**Chromatin Immunoprecipitation (ChIP).** The procedure was performed as described previously (3). Anti-H3K9me2 (ab1220, Abcam) and anti-Cnp1 (gift from Robin Allshire, U. Edinburgh) antibodies were used for immunoprecipitation. Unless specified, yeast cells were cultured in YES medium at 29°C and harvested in the log phase. Temperature sensitive (*ts*) strains were cultured at 26°C (labeled as 26°C), or cultured at 26°C and then shifted to 36°C for 6 hours (labeled as 36°C). Biological replicates (labeled as “#”) were performed in several indicated strains by H3K9me2 and Cnp1 ChIP-seq. Other ChIP-seq experiments were performed once.

**High throughput sequencing and data analysis.** The commercial library preparation kit (KAPA) and manufacturer’s procedures were used for ChIP-seq library construction. Briefly, the DNA libraries were sequenced on the Ion PGM™ system (Life Technologies). Raw reads were aligned to the assembly *S. pombe* genome ASM294v.2.22 using Burrows-Wheeler Aligner (BWA)’s default parameters, which randomly assigned the ChIP-seq reads to the repetitive DNA sequences. Model-based Analysis of ChIP-seq (MACS) was used for peak calling of nucleosome positioning. The mapped reads in individual samples were normalized by sequencing depth in million reads. The ChIP-seq data were visualized using Integrated Genome Viewer (IGV).

**Microscopy.** Ndc80-GFP tagged strains were grown at 29°C and treated with thiabendazole (TBZ, 20 µg/ml) for 30 min before microscopic observation. Strains carrying a conditional β-tubulin mutation (*nda3-KM311*) were cultured at 29°C and then shifted to 16°C for 8-12 hours (labeled as 16°C). For imaging and scoring of meiotic segregation of chromosome 1 in homozygotic cells at MI anaphase or

in four-spored asci (with *cen1*-GFP), haploid strains were crossed on low-nitrogen medium (ME) and incubated at 29°C for 2 or 3 days. Images were taken using a Delta Vision Elite microscope (Applied Precision) with a 60X, 1.42 NA oil lens. Deconvolution and image projections (maximum intensity) were used for further image processing.

**Spore viability.** Single colonies of each diploid strain were suspended in 30  $\mu$ l water, and sporulated on ME plates at 29°C for 2 or 3 days, then spread onto YES plate, and four-spored asci were separated by micromanipulation using a glass needle for dissection. The tetrads were incubated at 16°C overnight or 36°C 4 hours, and individual spores from four-spored asci were separated on the plate. The number of the total analyzed spores was scored. Plates were incubated at 26°C for 5-7 days. The number of the viable spores was scored.

**Data availability.** The raw and processed ChIP-seq data are deposited in the NCBI Gene Expression Omnibus (GEO) under the accession number GSE118016.

Figure S1

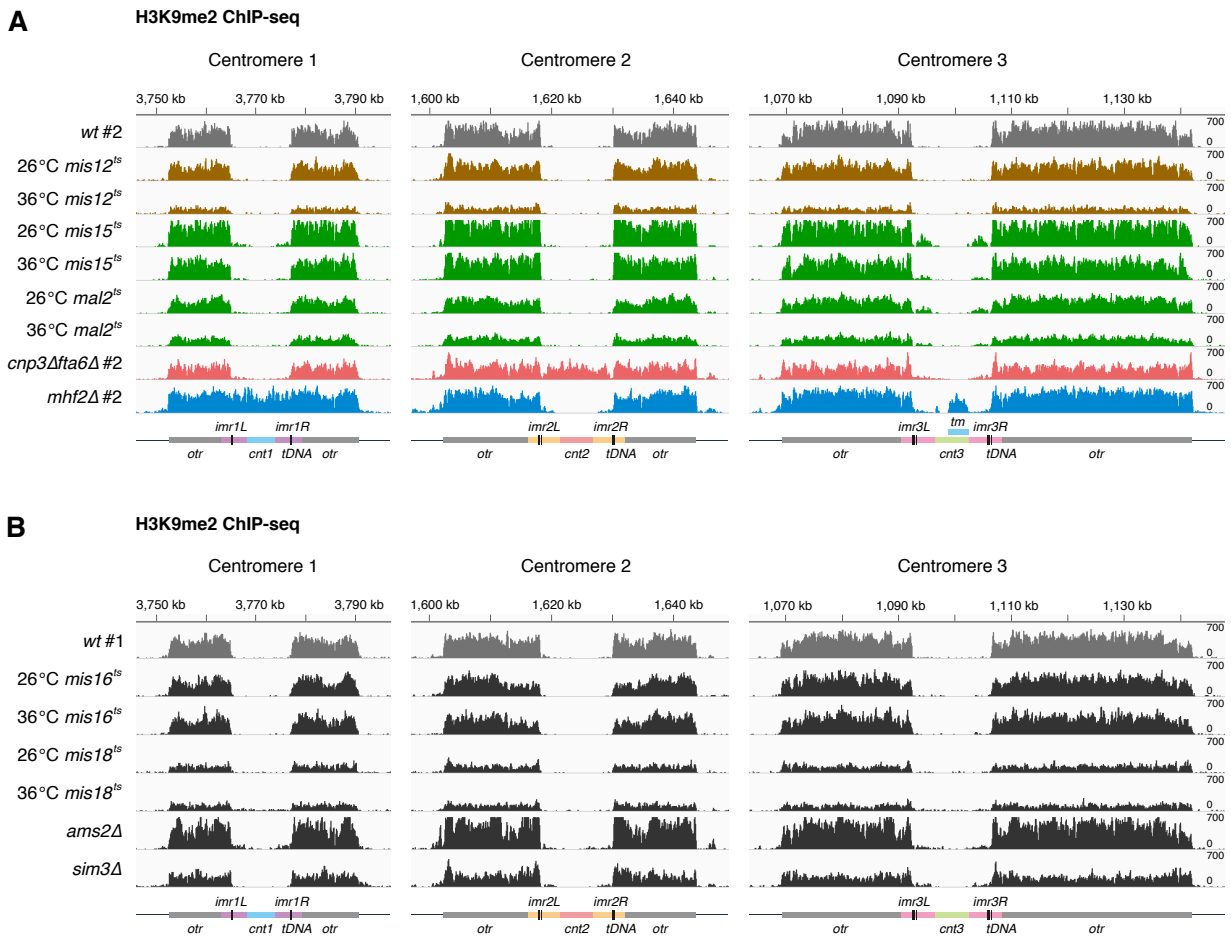

**Fig. S1. *mhf2Δ* and *cnp3Δfta6Δ* induce centromere inactivation.** (A) H3K9me2 ChIP-seq reads mapped to centromeric and pericentromeric regions of all three chromosomes in outer kinetochore mutants (brown), inner kinetochore mutants (green), *mhf2Δ* (blue) and *cnp3Δfta6Δ* (pink) compared to wild-type cells (gray). Strain names are as labeled. Cell cultures were incubated at 26°C (labeled as 26°C), or incubated at 26°C and shifted to 36°C for 6 hours (labeled as 36°C). (B) H3K9me2 ChIP-seq reads mapped to centromeric and pericentromeric regions of all three chromosomes in centromere-interacting mutants (black) compared to wild-type cells (gray). #1 and #2, biological replicate 1 and 2. The wild-type ChIP-seq raw data were previously published (3). Diagrams, X axis and Y axis, same as Fig. 1.

**Figure S2**

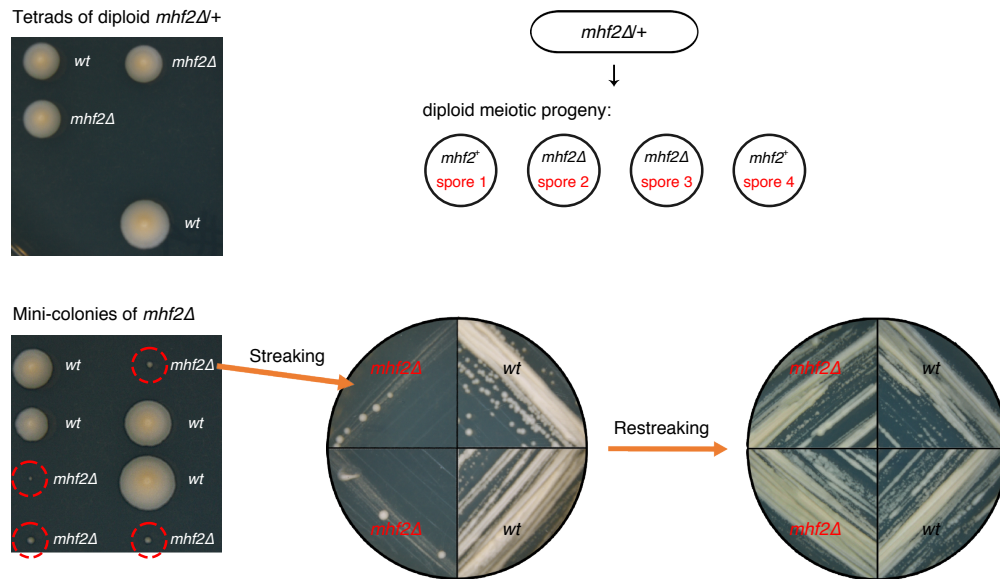

**Fig. S2. The meiotic progeny of diploid *mhf2Δ/+* have low viability.** Schematic illustrates the meiotic progeny of *mhf2Δ/+* asci. The meiotic progeny from *mhf2Δ/+* diploid cells were dissected on a YES plate and incubated at 26°C. Mini-colonies (red dashed-line circles) from the rare *mhf2Δ/+* asci with four viable spores were streaked on YES plates, incubated at 26°C for 6 days then re-streaked and incubated at 26°C for 6 days.

**Figure S3**

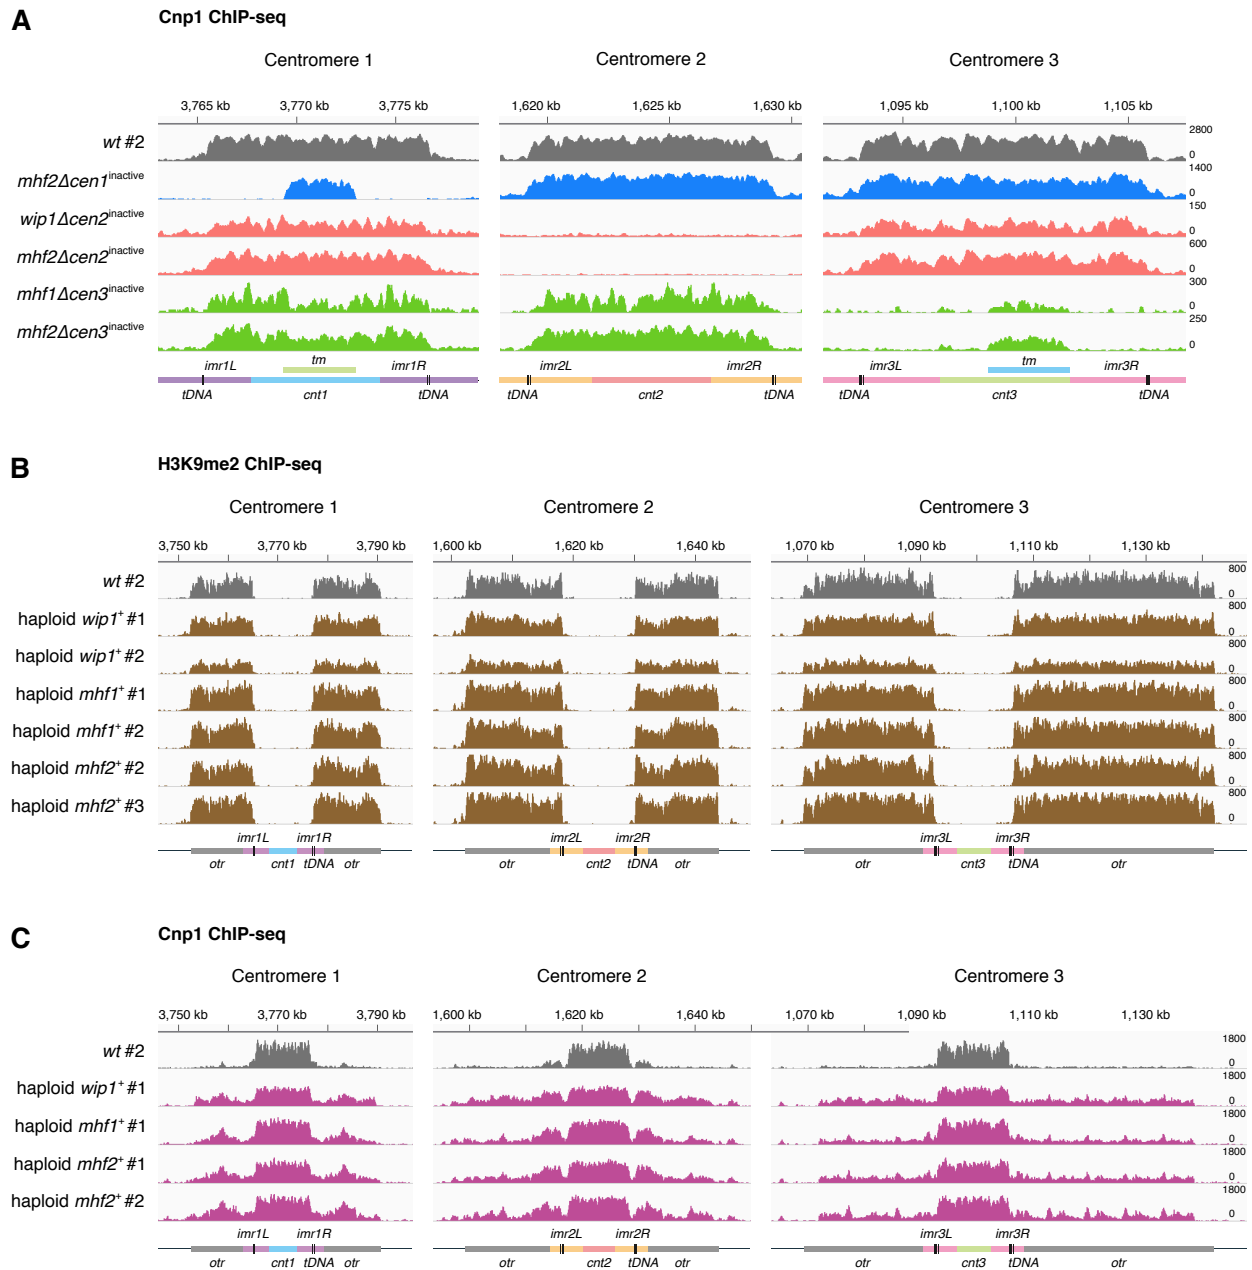

**Fig. S3. Centromere inactivation occurs postzygotically and independently among *wip1Δ*, *mhf1Δ* and *mhf2Δ* meiotic progeny.** (A) Cnp1 ChIP-seq reads mapped to centromeric regions of all three chromosomes in randomly chosen *wip1Δ*, *mhf1Δ* and *mhf2Δ* (*cen1*<sup>inactive</sup> blue, *cen2*<sup>inactive</sup> pink, *cen3*<sup>inactive</sup> green) meiotic haploid progeny compared to wild-type cells (*cen1/2/3*<sup>active</sup> gray). (B) H3K9me2 ChIP-seq reads mapped to centromeric and pericentromeric regions of all three chromosomes in the meiotic haploid progeny *wip1*<sup>+</sup>, *mhf1*<sup>+</sup>, *mhf2*<sup>+</sup> (brown) compared to wild-type cells (gray). (C) Cnp1 ChIP-seq reads mapped to centromeric and pericentromeric regions of all three chromosomes in the meiotic haploid progeny *wip1*<sup>+</sup>, *mhf1*<sup>+</sup>, *mhf2*<sup>+</sup> (magenta) compared to wild-type cells (gray). Tested strains were identical to that used in H3K9me2 ChIP-seq analysis as labeled in (B). #1 – #3, biological replicate 1 to 3. Diagrams, X axis and Y axis, same as Fig. 1.

**Figure S4**

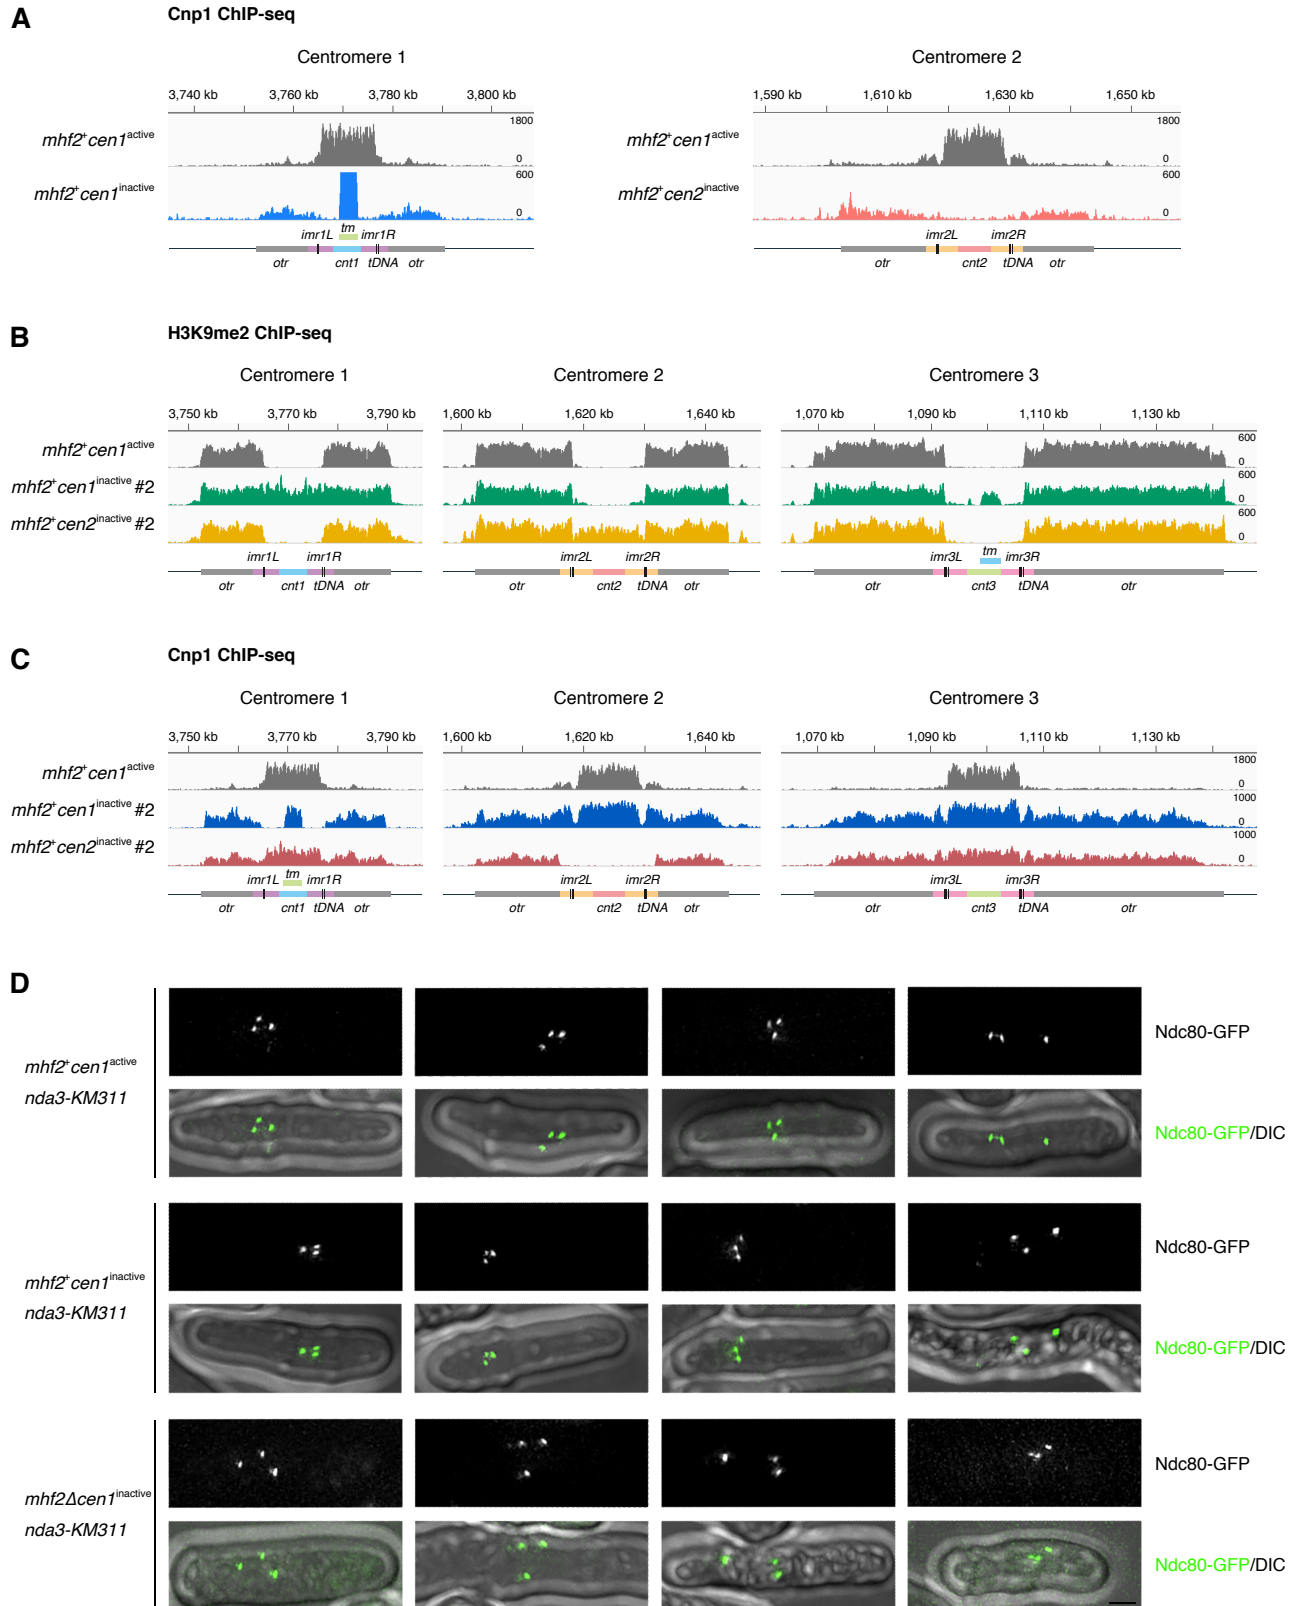

**Fig. S4. CENP-T-W-S-X components are dispensable for the mitotic maintenance of neocentromeres.** (A) “Zoomed-in” illustrations of part of **Fig. 3B** to highlight the moderate levels of Cnp1 occupancy on the inactivated centromeres. (B) H3K9me2 ChIP-seq reads mapped to centromeric and pericentromeric regions of all three chromosomes in *mhf2<sup>+</sup>cen1<sup>inactive</sup>* (green) and *mhf2<sup>+</sup>cen2<sup>inactive</sup>* (yellow) compared to wild-type cells (gray). (C) Cnp1 ChIP-seq reads mapped to centromeric and pericentromeric regions of all three chromosomes in identical strains *mhf2<sup>+</sup>cen1<sup>inactive</sup>* (dark blue) and *mhf2<sup>+</sup>cen2<sup>inactive</sup>* (dark pink) compared to wild-type cells (gray). #2, biological replicate 2. Diagrams, X axis and Y axis, same as **Fig. 1**. (D) Three dots of outer kinetochore Ndc80-GFP observed in *mhf2<sup>+</sup>cen1<sup>active</sup>*, *mhf2 $\Delta$ cen1<sup>inactive</sup>* and *mhf2<sup>+</sup>cen1<sup>inactive</sup>*. Cells were arrested in prometaphase by conditional inactivation of  $\beta$ -tubulin (*nda3-KM311*) at the restrictive temperature 16°C for 10 hours. Scale bar, 2  $\mu$ m.



**Figure S5**

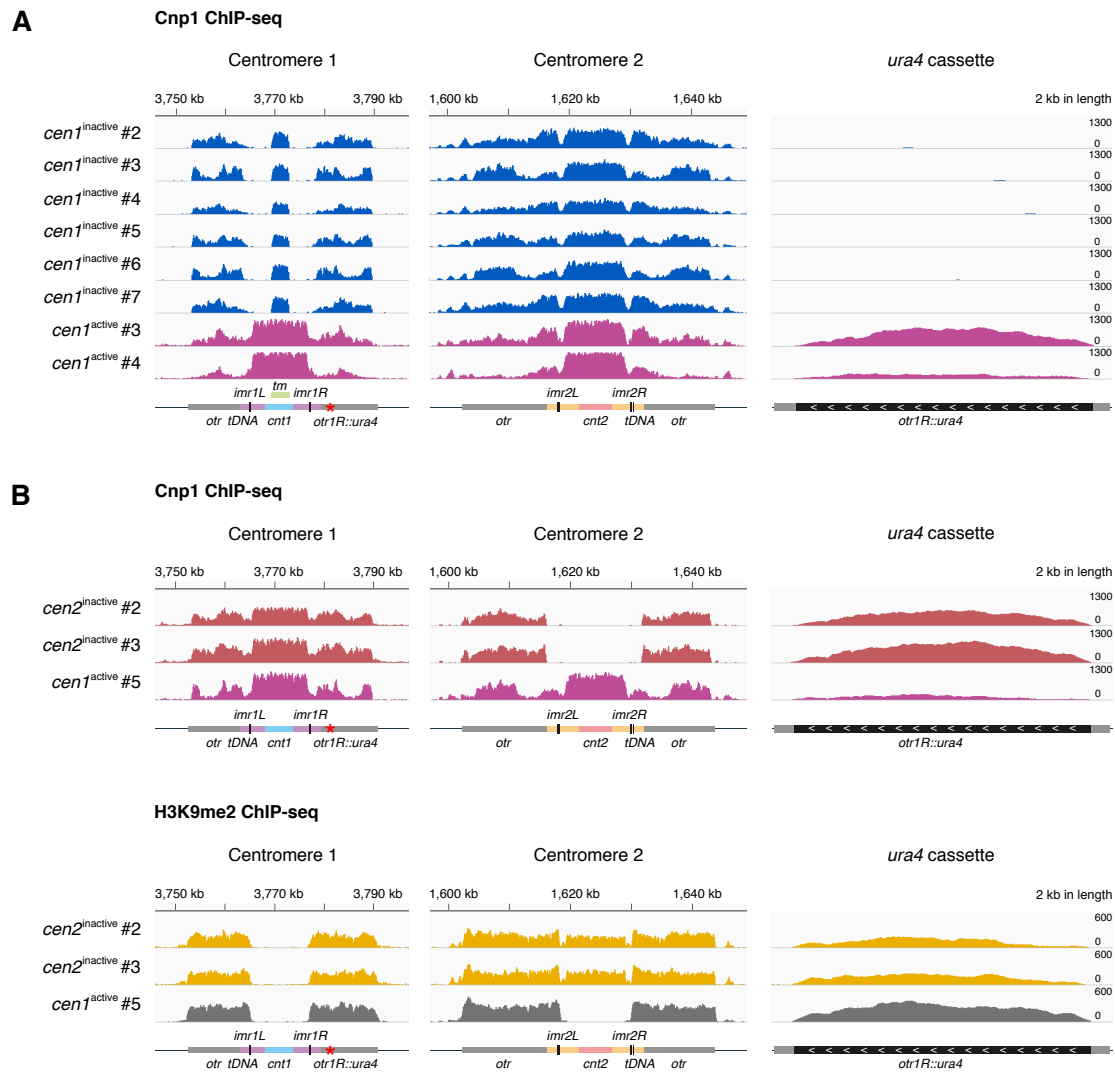

**Fig. S5. Cnp1 occupancy on the pericentromeric repetitive sequences is ubiquitous and asymmetric for all three centromeres with Cnp1 spreading. (A)** Cnp1 ChIP-seq reads mapped to centromeric and pericentromeric regions of all three chromosomes in *cen1*<sup>inactive</sup> (dark blue) and *cen1*<sup>active</sup> (magenta) with Cnp1 spreading. **(B)** Cnp1 ChIP-seq reads and H3K9me2 ChIP-seq reads mapped to centromeric and pericentromeric regions of all three chromosomes in *cen2*<sup>inactive</sup> and *cen1*<sup>active</sup> with Cnp1 spreading. *ura4* cassette was inserted into the right side of the *otr1R* (*otr1R::ura4*) and labeled by a red asterisk. chromosome 1, 2 and *otr1R::ura4* cassette are shown. #2 – #7, biological replicate 2 to 7. Diagrams, X axis and Y axis, same as **Fig. 1**.

**Figure S6**

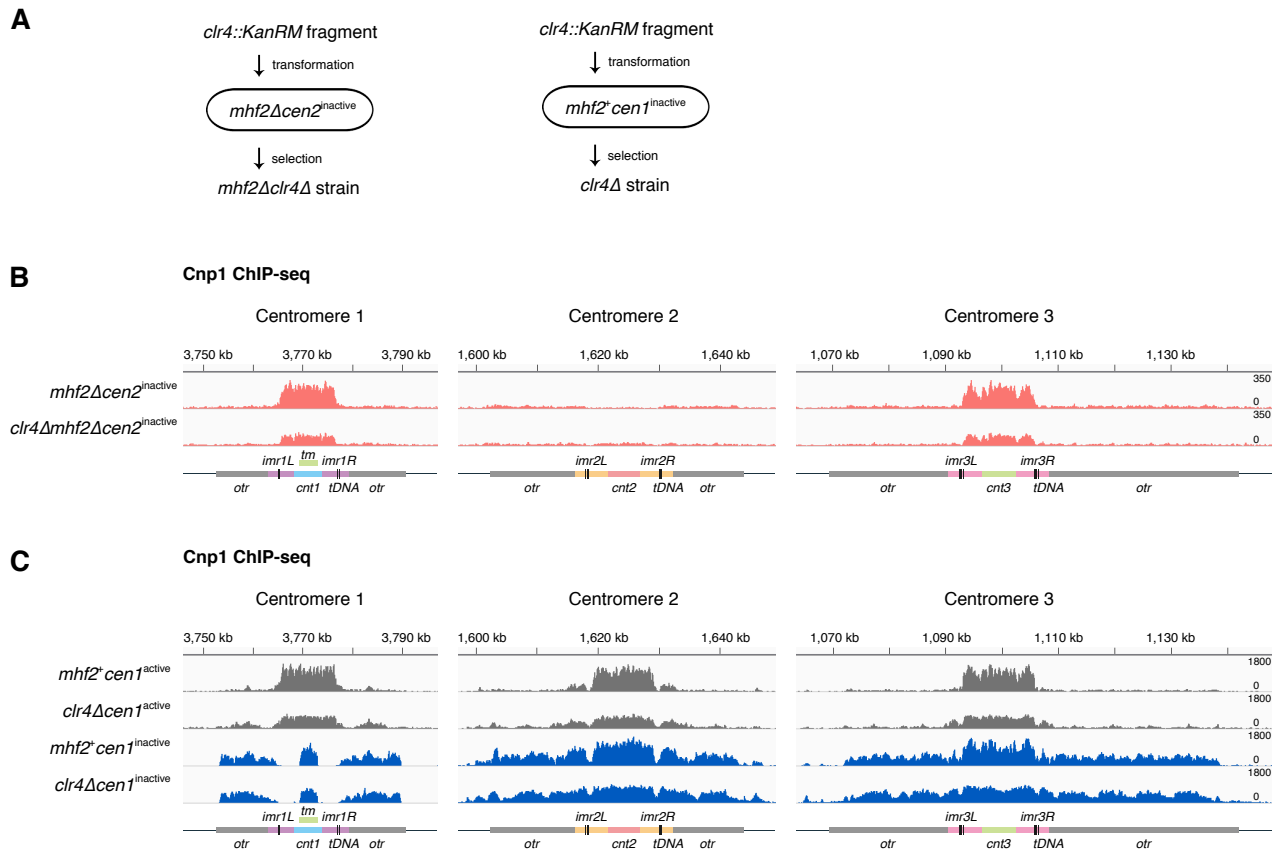

**Fig. S6. Heterochromatin modification (H3K9me2) is not required for mitotic maintenance of the repositioned centromere.** (A) Schematics illustrate the deletion of *clr4* in *mhf2Δcen2<sup>inactive</sup>* (left) and *mhf2<sup>+</sup>cen1<sup>inactive</sup>* (right) by DNA transformation. (B) Cnp1 ChIP-seq reads mapped to centromeric and pericentromeric regions of all three chromosomes in *mhf2Δcen2<sup>inactive</sup>* (pink) and *clr4Δmhf2Δcen2<sup>inactive</sup>* (pink). (C) Cnp1 ChIP-seq reads mapped to centromeric and pericentromeric regions of all three chromosomes in *clr4Δcen1<sup>active</sup>* (gray), *mhf2<sup>+</sup>cen1<sup>inactive</sup>* (dark blue) and *clr4Δcen1<sup>inactive</sup>* (dark blue) compared to *mhf2<sup>+</sup>cen1<sup>active</sup>* wildtype (gray). Diagrams, X axis and Y axis, same as **Fig. 1**.

**Figure S7**

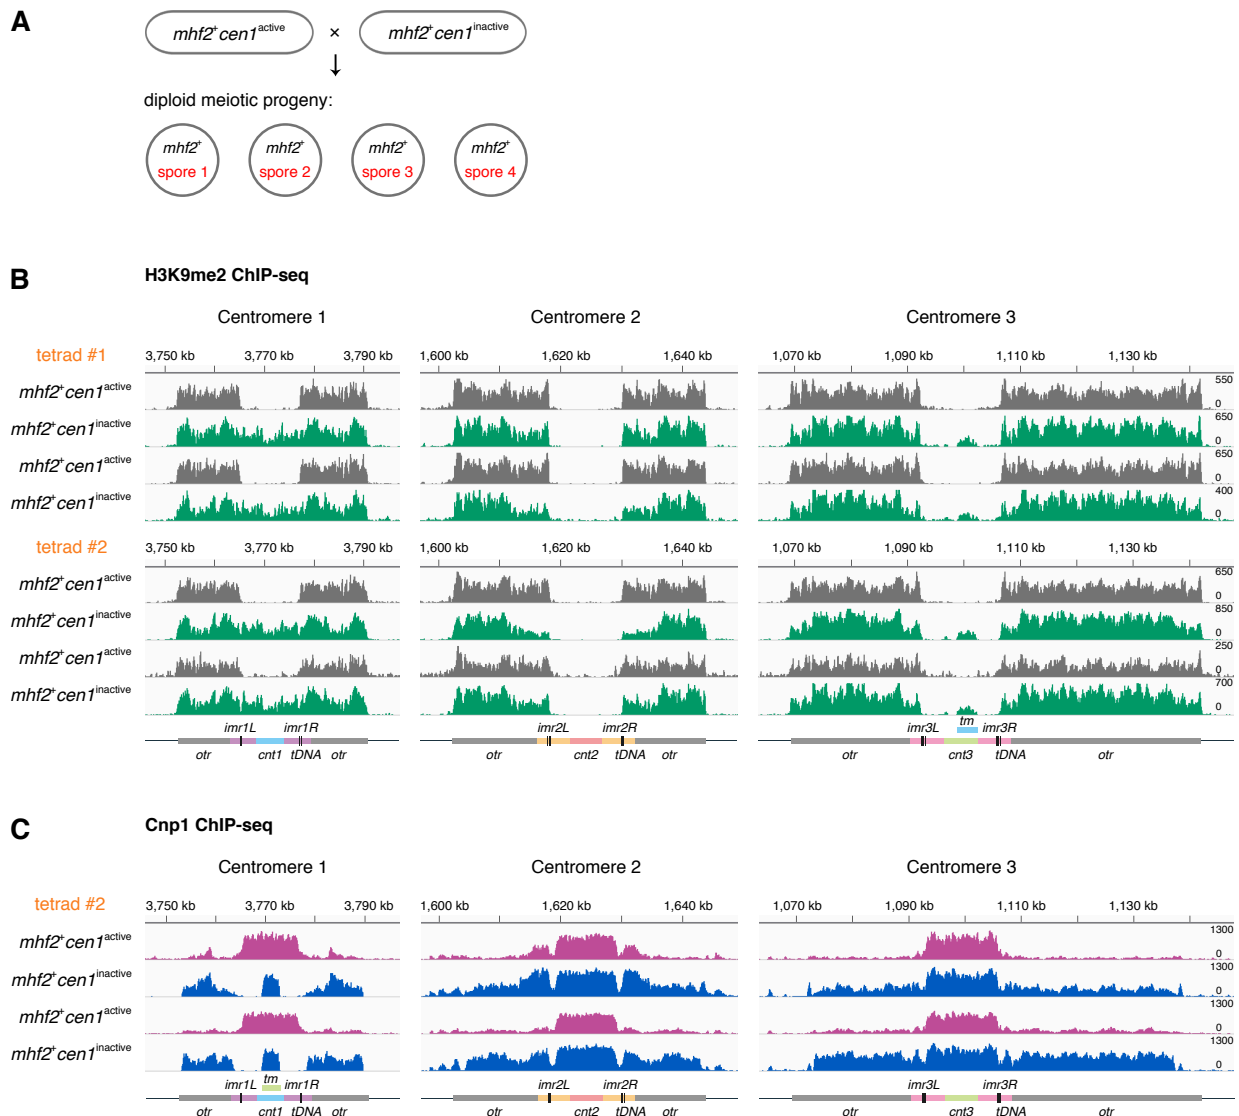

**Fig. S7. The spreading of centromeric Cnp1 in  $mhf2^+ cen1^{active}$  is caused by  $mhf2^+ cen1^{inactive}$  through meiosis.** (A) Schematic illustrates the meiotic progeny of  $mhf2^+ cen1^{active} \times mhf2^+ cen1^{inactive}$  in asci with four spores. (B) H3K9me2 ChIP-seq reads mapped to centromeric and pericentromeric regions of all three chromosomes in four viable progeny from the same asci (tetrad #1 and #2).  $cen1^{inactive}$  (green) conformed to Mendelian inheritance (2 : 2 segregation pattern). Tested strains of tetrad #1 were identical to that used in H3K9me2 ChIP-seq analysis as labeled in Fig. 5A. (C) Cnp1 ChIP-seq reads mapped to centromeric and pericentromeric regions of all three chromosomes in four viable progeny from the same ascus (tetrad #2).  $mhf2^+ cen1^{inactive}$  (dark blue) conformed to Mendelian inheritance (2 : 2 segregation pattern).  $mhf2^+ cen1^{active}$  (magenta) exhibited the spreading of Cnp1 into the pericentromeric regions. SI Appendix, Fig. S7B and S7C used the same strains of tetrad #2. Diagrams, X axis and Y axis, same as Fig. 1.

**Figure S8**

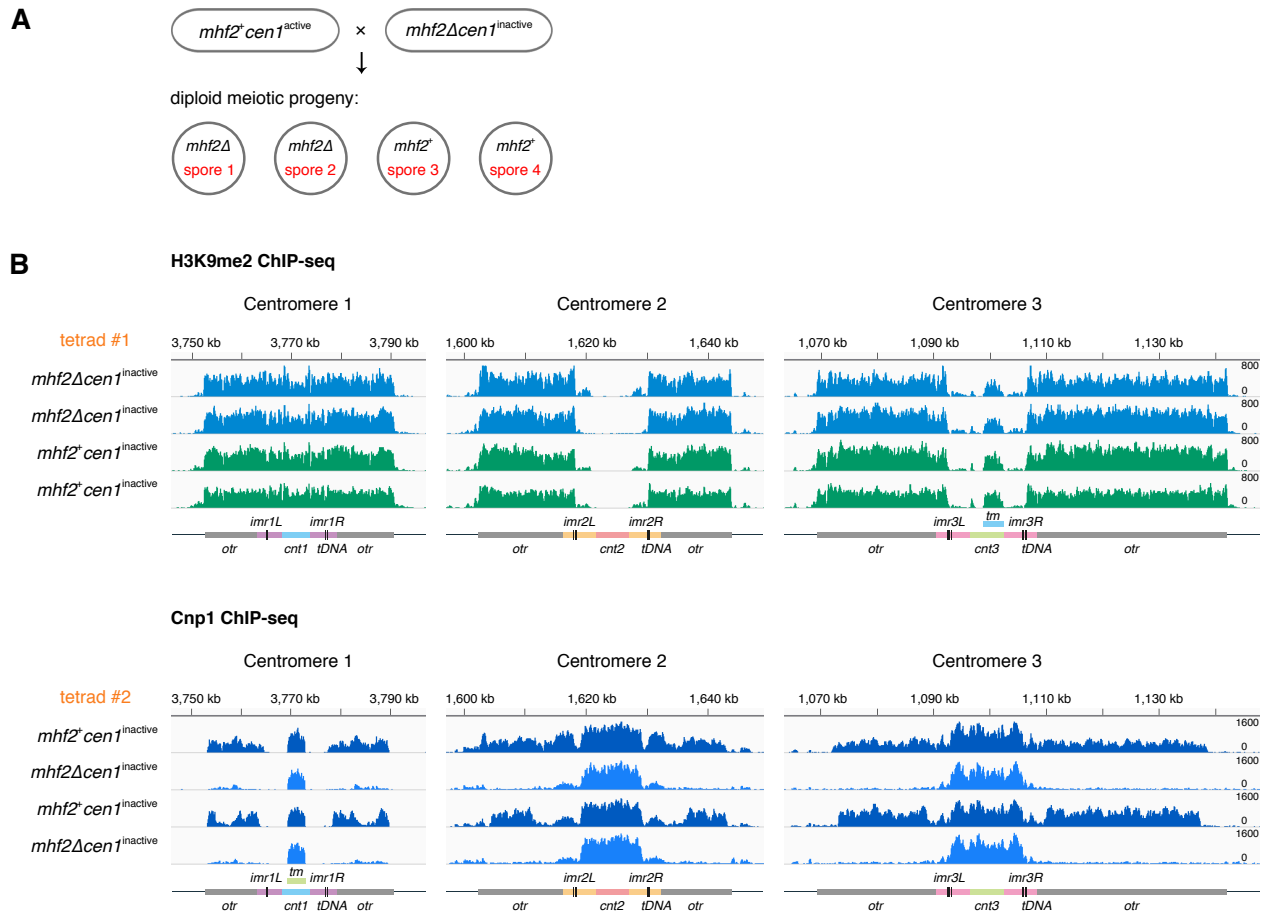

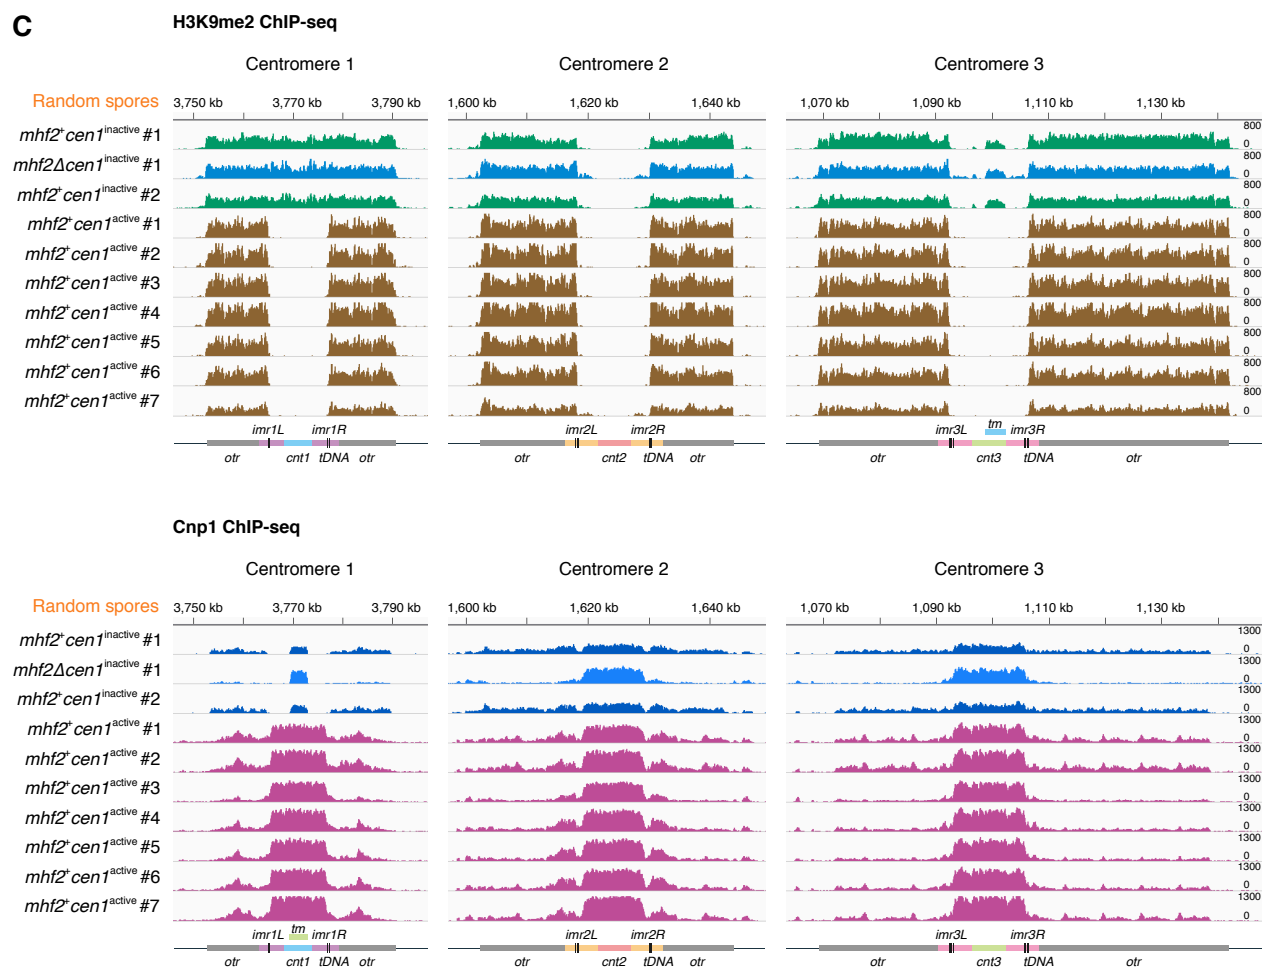

**Fig. S8. *mhf2Δ* tends to convert the original centromere into an inactivated one in heterozygous meiosis.** (A) Schematic illustrates the meiotic progeny of *mhf2<sup>+</sup>cen1<sup>active</sup>* × *mhf2Δcen1<sup>inactive</sup>* in asci with four spores. (B) H3K9me2 ChIP-seq reads and Cnp1 ChIP-seq reads mapped to centromeric and pericentromeric regions of all three chromosomes in four viable meiotic progeny from the tetrad #1 and #2, respectively. *mhf2Δ* conformed to Mendelian inheritance (2 : 2 segregation pattern). *cen1<sup>inactive</sup>* was identified. (C) H3K9me2 ChIP-seq reads and Cnp1 ChIP-seq reads mapped to centromeric and pericentromeric regions of all three chromosomes in randomly obtained viable meiotic progeny from *mhf2Δcen1<sup>inactive</sup>* × *mhf2<sup>+</sup>cen1<sup>active</sup>*. Two *mhf2<sup>+</sup>cen1<sup>inactive</sup>* were identified (#1 – #2). Seven biological replicates (#1 – #7) of *mhf2<sup>+</sup>cen1<sup>active</sup>* (magenta) exhibited the spreading of Cnp1 into the pericentromeric regions. Diagrams, X axis and Y axis, same as **Fig. 1**.

**Figure S9**

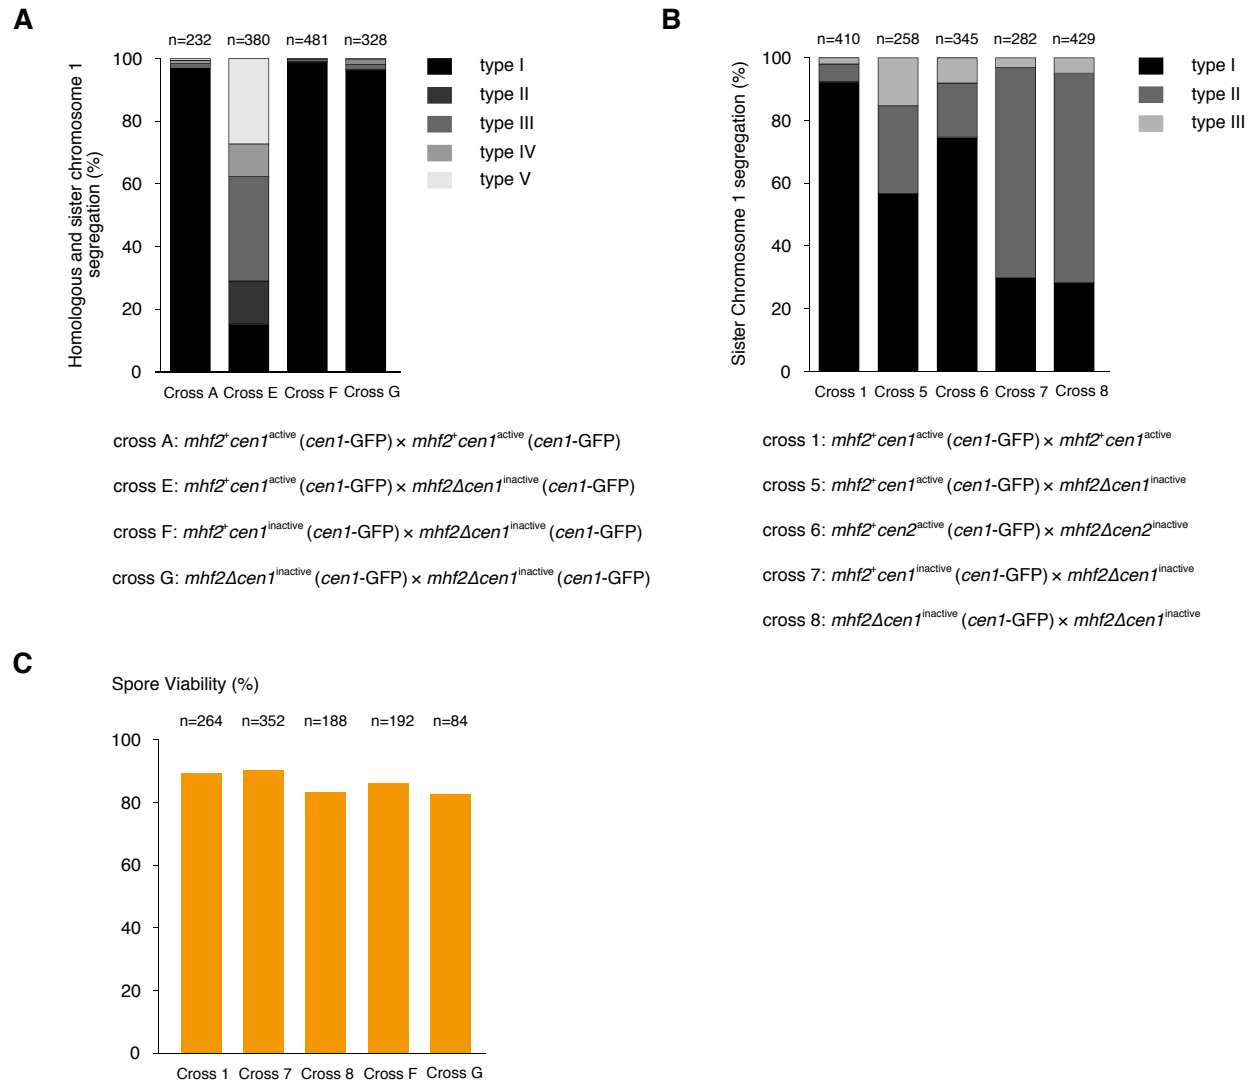

**Fig. S9. Abnormal meiotic chromosome segregation accounts for the poor spore viability in heterozygotic meiosis with mismatched centromeres.** (A) Both parental cells were labeled with *cen1*-GFP (green dot). The quantification of *cen1*-GFP dots distribution (type I to V) in four-spored asci of heterozygotic and homozygotic meiosis to trace the meiotic segregation of homologous chromosome 1 and sister chromosome 1. Cross A and E,  $mhf2^+ cen1^{active}$  cells crossed to  $mhf2^+ cen1^{active}$  and  $mhf2\Delta cen1^{inactive}$  cells, respectively. Cross F and G,  $mhf2^+ cen1^{inactive}$  and  $mhf2\Delta cen1^{inactive}$  cells crossed to  $mhf2\Delta cen1^{inactive}$  cells, respectively. n, the total four-spored asci analyzed. (B) One of the parental cells was labeled with *cen1*-GFP (green dot). The quantification of sister *cen1*-GFP dots distribution (type I to III) in four-spored asci of heterozygotic and homozygotic meiosis to trace the meiotic segregation of sister chromosome 1. Cross 1 and 5,  $mhf2^+ cen1^{active}$  cells crossed to  $mhf2^+ cen1^{active}$  and  $mhf2\Delta cen1^{inactive}$  cells, respectively. Cross 6,  $mhf2^+ cen2^{active}$  cells carrying the *cen1*-GFP were crossed to  $mhf2\Delta cen2^{inactive}$  cells with mismatched *cen2*. Cross 7 and 8,  $mhf2^+ cen1^{inactive}$  and  $mhf2\Delta cen1^{inactive}$  cells crossed to  $mhf2\Delta cen1^{inactive}$  cells, respectively. n, the total four-spored asci analyzed. (C) Intact asci with four spores from the above genetic crosses were dissected microscopically and scored for the number of viable spores. Spore viability was calculated as the ratio of the number of viable spores to the number of analyzed spores. n, the total spores analyzed.

**Table S1. Spore lethality is random among the meiotic progeny of diploid *wip1* $\Delta$ /+, *mhf1* $\Delta$ /+ and *mhf2* $\Delta$ /+**

|                         | Spore viability | Total dissected asci (n) | Viable deletion progeny : Viable wild-type progeny |
|-------------------------|-----------------|--------------------------|----------------------------------------------------|
| <i>wild type</i> (+/+)  | 94.68%          | 47                       | 0 : 178                                            |
| <i>wip1</i> $\Delta$ /+ | 44.8%           | 48                       | 41 : 45                                            |
| <i>mhf1</i> $\Delta$ /+ | 48.0%           | 48                       | 44 : 48                                            |
| <i>mhf2</i> $\Delta$ /+ | 46.5%           | 36                       | 35 : 32                                            |

The wild-type diploid and heterozygous deletion diploid strains were subjected to tetrad dissection. Intact asci with four spores were dissected microscopically and scored for the number of viable spores. Spore viability is calculated as the ratio of the number of viable spores to the number of analyzed spores. The number of viable deletion progeny and viable wild-type progeny were counted.

**Table S2. Centromere inactivation occurs randomly in one of the three centromeres in *wip1Δ*, *mhf1Δ* and *mhf2Δ***

| Genotype     | Strain | <i>cen1</i> <sup>inactive</sup> | <i>cen2</i> <sup>inactive</sup> | <i>cen3</i> <sup>inactive</sup> |
|--------------|--------|---------------------------------|---------------------------------|---------------------------------|
| <i>wip1Δ</i> | LM999  | +                               | –                               | –                               |
|              | LM1000 | –                               | +                               | –                               |
| <i>mhf1Δ</i> | LM997  | –                               | +                               | –                               |
|              | LM998  | –                               | –                               | +                               |
| <i>mhf2Δ</i> | LM705  | +                               | –                               | –                               |
|              | LM722  | –                               | +                               | –                               |
|              | LM732  | –                               | +                               | –                               |
|              | LM734  | –                               | –                               | +                               |
|              | LM735  | –                               | –                               | +                               |
|              | LM725  | –                               | –                               | +                               |



**Table S3. Incompatibility between neocentromeres and original centromeres causes a meiosis barrier**

| Cross                                                          | Spore viability | Dissected Asci (n) | Asci with 4 viable spores | Asci with one or no viable spores | Meiosis barrier |
|----------------------------------------------------------------|-----------------|--------------------|---------------------------|-----------------------------------|-----------------|
| $mhf2 + cen1^{inactive} \times mhf2\Delta cen1^{inactive}$     | 91.3%           | 204                | 76%                       | 1.96%                             | ×               |
| $mhf2 + cen1^{inactive} \times mhf2\Delta cen2^{inactive}$     | 26.8%           | 291                | 0.34%                     | 69.1%                             | √               |
| $mhf2\Delta cen1^{inactive} \times mhf2\Delta cen2^{inactive}$ | 20.0%           | 251                | 0.40%                     | 78.9%                             | √               |

Additional genetic crosses between cells with mismatched ( $mhf2 + cen1^{inactive} \times mhf2\Delta cen2^{inactive}$ ,  $mhf2\Delta cen1^{inactive} \times mhf2\Delta cen2^{inactive}$ ) or matched ( $mhf2 + cen1^{inactive} \times mhf2\Delta cen1^{inactive}$ ) centromeres were subjected to tetrad dissection. Intact asci with four spores were dissected microscopically and scored for the number of viable spores. Spore viability is calculated as the ratio of the number of viable spores to the number of analyzed spores. > 50% reduction in spore viability is defined as meiosis barrier.

**Table S4. Incompatibility between neocentromeres and original centromeres causes poor progeny viability and represents a meiosis barrier**

| Cross                                                                                                                     | Dissected<br>Asci (n) | Asci with 4<br>viable spores | Asci with 3<br>viable spores | Asci with 2<br>viable spores | Asci with 1<br>viable spore | Asci with 0<br>viable spore |
|---------------------------------------------------------------------------------------------------------------------------|-----------------------|------------------------------|------------------------------|------------------------------|-----------------------------|-----------------------------|
| <i>mhf2</i> <sup>+</sup> <i>cen1</i> <sup>active</sup> ×<br><i>mhf2</i> <sup>+</sup> <i>cen1</i> <sup>active</sup>        | 130                   | 80%                          | 14.6%                        | 3.8%                         | 0.77%                       | 0.77%                       |
| <i>mhf2</i> Δ <i>cen1</i> <sup>inactive</sup> ×<br><i>mhf2</i> <sup>+</sup> <i>cen1</i> <sup>active</sup>                 | 254                   | 5.9%                         | 10.6%                        | 30.7%                        | 29.1%                       | 24.0%                       |
| <i>mhf2</i> <sup>+</sup> <i>cen1</i> <sup>inactive</sup> ×<br><i>mhf2</i> <sup>+</sup> <i>cen1</i> <sup>active</sup>      | 272                   | 4.04%                        | 1.1%                         | 25.4%                        | 30.5%                       | 39.0%                       |
| <i>mhf2</i> <sup>+</sup> <i>cen1</i> <sup>inactive</sup> ×<br><i>mhf2</i> <sup>+</sup> <i>cen1</i> <sup>inactive</sup> #1 | 108                   | 68.5%                        | 24.1%                        | 5.6%                         | 1.9%                        | 0%                          |
| <i>mhf2</i> <sup>+</sup> <i>cen1</i> <sup>inactive</sup> ×<br><i>mhf2</i> <sup>+</sup> <i>cen1</i> <sup>inactive</sup> #2 | 106                   | 9.4%                         | 18.9%                        | 9.4%                         | 12.3%                       | 50%                         |
| <i>mhf2</i> <sup>+</sup> <i>cen1</i> <sup>inactive</sup> ×<br><i>mhf2</i> <sup>+</sup> <i>cen2</i> <sup>inactive</sup>    | 377                   | 0.80%                        | 4.0%                         | 14.1%                        | 35.8%                       | 45.4%                       |
| <i>mhf2</i> <sup>+</sup> <i>cen1</i> <sup>inactive</sup> ×<br><i>mhf2</i> Δ <i>cen1</i> <sup>inactive</sup>               | 204                   | 76%                          | 16.7%                        | 5.4%                         | 0.49%                       | 1.47%                       |
| <i>mhf2</i> <sup>+</sup> <i>cen1</i> <sup>inactive</sup> ×<br><i>mhf2</i> Δ <i>cen2</i> <sup>inactive</sup>               | 291                   | 0.34%                        | 4.1%                         | 26.5%                        | 40.6%                       | 28.5%                       |
| <i>mhf2</i> Δ <i>cen1</i> <sup>inactive</sup> ×<br><i>mhf2</i> Δ <i>cen2</i> <sup>inactive</sup>                          | 251                   | 0.40%                        | 2.0%                         | 18.7%                        | 35.1%                       | 43.8%                       |

Detailed information of all the genetic crossings in Table 1 and Table S3.

**Table S5. List of *S. pombe* strains used in this study**

| <b>Name</b> | <b>Genotype</b>                                                                                                                           | <b>Origin</b>                        |
|-------------|-------------------------------------------------------------------------------------------------------------------------------------------|--------------------------------------|
| QG323       | <i>h+</i> , <i>nuf2-1</i> , <i>leu1-32</i>                                                                                                | National BioResource Project (Japan) |
| XL296       | <i>h-</i> , <i>mis12-537</i> , <i>leu1-32</i>                                                                                             | National BioResource Project (Japan) |
| XL297       | <i>h+</i> , <i>mis15-68</i> , <i>leu1-32</i>                                                                                              | National BioResource Project (Japan) |
| QG346       | <i>h+</i> , <i>mal2-1</i> , <i>leu1-32</i>                                                                                                | National BioResource Project (Japan) |
| XL211       | <i>h-</i> , <i>sim4-193</i> , <i>ade6-210</i> , <i>arg3-D4</i> , <i>his3-D1</i> , <i>leu1-32</i> , <i>ura4-D18</i>                        | (4)                                  |
| b28-C08     | <i>h?</i> , <i>fta6Δ::kanMX6</i> , <i>ade6Δ::hphMX6</i> , <i>cnt2::ade6-natMX6</i> , <i>leu1-32</i> , <i>ura4D</i>                        | <i>S. pombe</i> deletion library     |
| b35-D11     | <i>h?</i> , <i>cnp3Δ::kanMX6</i> , <i>ade6Δ::hphMX6</i> , <i>cnt2::ade6-natMX6</i> , <i>leu1-32</i> , <i>ura4D</i>                        | <i>S. pombe</i> deletion library     |
| LM850       | <i>h?</i> , <i>cnp3Δ::kanMX6</i> , <i>fta6Δ::kanMX6</i> , <i>ade6Δ::hphMX6</i> , <i>cnt2::ade6-natMX6</i> , <i>leu1-32</i> , <i>ura4D</i> | This study                           |
| LM842       | <i>h?</i> , <i>cnp3Δ::KanMX6</i> , <i>fta6Δ::KanMX6</i> , <i>ade6Δ::hphMX6</i> , <i>cnt2::ade6-natMX6</i> , <i>leu1-32</i> , <i>ura4D</i> | This study                           |
| b25-E05     | <i>h?</i> , <i>mhf2Δ::kanMX6</i> , <i>ade6Δ::hphMX6</i> , <i>cnt2::ade6-natMX6</i> , <i>leu1-32</i> , <i>ura4D</i>                        | <i>S. pombe</i> deletion library     |
| LM569       | <i>h?</i> , <i>mhf2Δ::kanMX6</i> , <i>ade6Δ::hphMX6</i> , <i>cnt2::ade6-natMX6</i> , <i>leu1-32</i> , <i>ura4D</i>                        | This study                           |
| QG365       | <i>h-</i> , <i>mis16-53</i> , <i>leu1-32</i>                                                                                              | National BioResource Project (Japan) |
| QG366       | <i>h-</i> , <i>mis18-262</i> , <i>leu1-32</i>                                                                                             | National BioResource Project (Japan) |
| XL695       | <i>h+</i> , <i>ams2Δ::kanMX6</i>                                                                                                          | This study                           |
| XL561       | <i>h+</i> , <i>sim3Δ::kanMX6</i> , <i>ade6</i> , <i>leu1-32</i> , <i>ura4-D18</i>                                                         | This study                           |
| LW42        | <i>h+/h-</i>                                                                                                                              | This study                           |
| LM702       | <i>h+/h-</i> , <i>wip1Δ::natMX6/wip1<sup>+</sup></i>                                                                                      | This study                           |
| LM700       | <i>h+/h-</i> , <i>wip1Δ::natMX6/wip1<sup>+</sup></i>                                                                                      | This study                           |
| LM701       | <i>h+/h-</i> , <i>mhf1Δ::natMX6/mhf1<sup>+</sup></i>                                                                                      | This study                           |
| LM608       | <i>h+/h-</i> , <i>mhf1Δ::natMX6/mhf1<sup>+</sup></i>                                                                                      | This study                           |
| LM599       | <i>h+/h-</i> , <i>mhf2Δ::natMX6/mhf2<sup>+</sup></i>                                                                                      | This study                           |
| LM600       | <i>h+/h-</i> , <i>mhf2Δ::natMX6/mhf2<sup>+</sup></i>                                                                                      | This study                           |
| LM982       | <i>h?</i> , <i>haploid mhf2<sup>+</sup></i>                                                                                               | This study                           |
| LM971       | <i>h?</i> , <i>haploid wip1<sup>+</sup></i>                                                                                               | This study                           |
| LM974       | <i>h?</i> , <i>haploid wip1<sup>+</sup></i>                                                                                               | This study                           |
| LM962       | <i>h?</i> , <i>haploid mhf1<sup>+</sup></i>                                                                                               | This study                           |
| LM966       | <i>h?</i> , <i>haploid mhf1<sup>+</sup></i>                                                                                               | This study                           |

|         |                                                                                                        |                                  |
|---------|--------------------------------------------------------------------------------------------------------|----------------------------------|
| LM704   | <i>h?</i> , haploid <i>mhf2</i> <sup>+</sup>                                                           | This study                       |
| LM985   | <i>h?</i> , haploid <i>mhf2</i> <sup>+</sup>                                                           | This study                       |
| LM999   | <i>h?</i> , haploid <i>wip1Δcen1</i> <sup>inactive</sup>                                               | This study                       |
| LM997   | <i>h?</i> , haploid <i>mhf1Δcen2</i> <sup>inactive</sup>                                               | This study                       |
| LM735   | <i>h?</i> , haploid <i>mhf2Δcen3</i> <sup>inactive</sup>                                               | This study                       |
| LM705   | <i>h?</i> , haploid <i>mhf2Δcen1</i> <sup>inactive</sup>                                               | This study                       |
| LM1000  | <i>h?</i> , haploid <i>wip1Δcen2</i> <sup>inactive</sup>                                               | This study                       |
| LM732   | <i>h?</i> , haploid <i>mhf2Δcen2</i> <sup>inactive</sup>                                               | This study                       |
| LM998   | <i>h?</i> , haploid <i>mhf1Δcen3</i> <sup>inactive</sup>                                               | This study                       |
| LM734   | <i>h?</i> , haploid <i>mhf2Δcen3</i> <sup>inactive</sup>                                               | This study                       |
| LM722   | <i>h?</i> , haploid <i>mhf2Δcen2</i> <sup>inactive</sup>                                               | This study                       |
| LM725   | <i>h?</i> , haploid <i>mhf2Δcen3</i> <sup>inactive</sup>                                               | This study                       |
| XL403   | <i>h-</i> , <i>ndc80-GFP::kanMX6</i>                                                                   | (5)                              |
| LM885   | <i>h-</i> , <i>ndc80-GFP::kanMX6, mhf2Δcen1</i> <sup>inactive</sup>                                    | This study                       |
| LM940   | <i>h?</i> , <i>mhf2Δcen1</i> <sup>inactive</sup>                                                       | This study                       |
| LM1219  | <i>h?</i> , <i>mhf2</i> <sup>+</sup> <i>cen1</i> <sup>inactive</sup>                                   | This study                       |
| LM1144  | <i>h?</i> , <i>mhf2Δcen2</i> <sup>inactive</sup>                                                       | This study                       |
| LM1261  | <i>h?</i> , <i>mhf2</i> <sup>+</sup> <i>cen2</i> <sup>inactive</sup>                                   | This study                       |
| LM843   | <i>h?</i> , <i>mhf2</i> <sup>+</sup> <i>cen1</i> <sup>inactive</sup>                                   | This study                       |
| LM846   | <i>h?</i> , <i>mhf2</i> <sup>+</sup> <i>cen2</i> <sup>inactive</sup>                                   | This study                       |
| LM1037  | <i>h?</i> , <i>nda3-KM311, ndc80-GFP::kanMX6</i>                                                       | This study                       |
| LM1057  | <i>h?</i> , <i>nda3-KM311, ndc80-GFP::kanMX6, mhf2</i> <sup>+</sup> <i>cen1</i> <sup>inactive</sup>    | This study                       |
| LM1077  | <i>h?</i> , <i>nda3-KM311, ndc80-GFP::kanMX6, mhf2Δcen1</i> <sup>inactive</sup>                        | This study                       |
| LM1080  | <i>h?</i> , <i>nda3-KM311, ndc80-GFP::kanMX6, mhf2Δcen1</i> <sup>inactive</sup>                        | This study                       |
| SPT999a | <i>Msm10, leu1-32, his2, ade6-210, ura4D, otr1R::ura4</i> <sup>+</sup>                                 | (6)                              |
| SPKY10  | <i>h+</i> , <i>leu1-32, ade6-210, ura4D, otr1R::ura4</i> <sup>+</sup> , <i>Asf1-TAP::KanRM</i>         | (6)                              |
| LM1147  | <i>h?</i> , <i>mhf2</i> <sup>+</sup> <i>cen2</i> <sup>inactive</sup> , <i>otr1R::ura4</i> <sup>+</sup> | This study                       |
| LM1264  | <i>h?</i> , <i>mhf2</i> <sup>+</sup> <i>cen1</i> <sup>inactive</sup> , <i>otr1R::ura4</i> <sup>+</sup> | This study                       |
| LM1136  | <i>h?</i> , <i>mhf2</i> <sup>+</sup> <i>cen1</i> <sup>active</sup> , <i>otr1R::ura4</i> <sup>+</sup>   | This study                       |
| LM1121  | <i>h?</i> , <i>mhf2</i> <sup>+</sup> <i>cen1</i> <sup>active</sup> , <i>otr1R::ura4</i> <sup>+</sup>   | This study                       |
| LM1255  | <i>h?</i> , <i>mhf2</i> <sup>+</sup> <i>cen1</i> <sup>inactive</sup> , <i>otr1R::ura4</i> <sup>+</sup> | This study                       |
| LM1256  | <i>h?</i> , <i>mhf2</i> <sup>+</sup> <i>cen1</i> <sup>inactive</sup> , <i>otr1R::ura4</i> <sup>+</sup> | This study                       |
| LM1257  | <i>h?</i> , <i>mhf2</i> <sup>+</sup> <i>cen1</i> <sup>inactive</sup> , <i>otr1R::ura4</i> <sup>+</sup> | This study                       |
| LM1259  | <i>h?</i> , <i>mhf2</i> <sup>+</sup> <i>cen1</i> <sup>inactive</sup> , <i>otr1R::ura4</i> <sup>+</sup> | This study                       |
| LM1265  | <i>h?</i> , <i>mhf2</i> <sup>+</sup> <i>cen1</i> <sup>inactive</sup> , <i>otr1R::ura4</i> <sup>+</sup> | This study                       |
| LM1266  | <i>h?</i> , <i>mhf2</i> <sup>+</sup> <i>cen1</i> <sup>inactive</sup> , <i>otr1R::ura4</i> <sup>+</sup> | This study                       |
| LM1135  | <i>h?</i> , <i>mhf2</i> <sup>+</sup> <i>cen1</i> <sup>active</sup> , <i>otr1R::ura4</i> <sup>+</sup>   | This study                       |
| LM1219  | <i>h?</i> , <i>mhf2</i> <sup>+</sup> <i>cen1</i> <sup>active</sup> , <i>otr1R::ura4</i> <sup>+</sup>   | This study                       |
| LM1148  | <i>h?</i> , <i>mhf2</i> <sup>+</sup> <i>cen2</i> <sup>inactive</sup> , <i>otr1R::ura4</i> <sup>+</sup> | This study                       |
| LM1149  | <i>h?</i> , <i>mhf2</i> <sup>+</sup> <i>cen2</i> <sup>inactive</sup> , <i>otr1R::ura4</i> <sup>+</sup> | This study                       |
| LM1125  | <i>h?</i> , <i>mhf2</i> <sup>+</sup> <i>cen1</i> <sup>active</sup> , <i>otr1R::ura4</i> <sup>+</sup>   | This study                       |
| j03-D05 | <i>h?</i> , <i>clr4Δ::kanMX6, ade6Δ::hphMX6, cnt2::ade6-natMX6, leu1-32, ura4-D18</i>                  | <i>S. pombe</i> deletion library |
| LM1063  | <i>h?</i> , <i>mhf2Δclr4Δcen2</i> <sup>inactive</sup> , <i>leu1-32, ura4-D18</i>                       | This study                       |

|                   |                                                                                                                                                                                                          |                                                |
|-------------------|----------------------------------------------------------------------------------------------------------------------------------------------------------------------------------------------------------|------------------------------------------------|
| LM1005<br>b25-E05 | <i>h?</i> , <i>clr4Δcen1<sup>inactive</sup></i> , <i>leu1-32</i> , <i>ura4-D18</i><br><i>h?</i> , <i>mhf2Δ::kanMX6</i> , <i>ade6Δ::hphMX6</i> , <i>cnt2::ade6-natMX6</i> , <i>leu1-32</i> , <i>ura4D</i> | This study<br><i>S. pombe</i> deletion library |
| 446               | <i>h-</i> , <i>ade6-210</i> , <i>leu1-32</i> , <i>ura4D</i>                                                                                                                                              | This study                                     |
| 447               | <i>h+</i> , <i>ade6-216</i> , <i>leu1-32</i> , <i>ura4D</i>                                                                                                                                              | This study                                     |
| LM799             | <i>h?</i> , <i>mhf2<sup>+</sup>cen1<sup>active</sup></i> , <i>leu1-32</i> , <i>ura4-D18</i>                                                                                                              | This study                                     |
| LM800             | <i>h?</i> , <i>mhf2<sup>+</sup>cen1<sup>inactive</sup></i> , <i>leu1-32</i> , <i>ura4-D18</i>                                                                                                            | This study                                     |
| LM801             | <i>h?</i> , <i>mhf2<sup>+</sup>cen1<sup>active</sup></i> , <i>leu1-32</i> , <i>ura4-D18</i>                                                                                                              | This study                                     |
| LM802             | <i>h?</i> , <i>mhf2<sup>+</sup>cen1<sup>inactive</sup></i> , <i>leu1-32</i> , <i>ura4-D18</i>                                                                                                            | This study                                     |
| LM569             | <i>h-</i> , <i>mhf2Δcen1<sup>inactive</sup></i> , <i>leu1-32</i> , <i>ura4-D18</i>                                                                                                                       | This study                                     |
| LM570             | <i>h-</i> , <i>mhf2Δcen1<sup>inactive</sup></i> , <i>leu1-32</i> , <i>ura4-D18</i>                                                                                                                       | This study                                     |
| LM571             | <i>h-</i> , <i>mhf2<sup>+</sup>cen1<sup>inactive</sup></i> , <i>leu1-32</i> , <i>ura4-D18</i>                                                                                                            | This study                                     |
| LM572             | <i>h-</i> , <i>mhf2<sup>+</sup>cen1<sup>inactive</sup></i> , <i>leu1-32</i> , <i>ura4-D18</i>                                                                                                            | This study                                     |
| LM803             | <i>h?</i> , <i>mhf2<sup>+</sup>cen1<sup>active</sup></i> , <i>leu1-32</i> , <i>ura4-D18</i>                                                                                                              | This study                                     |
| LM804             | <i>h?</i> , <i>mhf2<sup>+</sup>cen1<sup>inactive</sup></i> , <i>leu1-32</i> , <i>ura4-D18</i>                                                                                                            | This study                                     |
| LM805             | <i>h?</i> , <i>mhf2<sup>+</sup>cen1<sup>active</sup></i> , <i>leu1-32</i> , <i>ura4-D18</i>                                                                                                              | This study                                     |
| LM806             | <i>h?</i> , <i>mhf2<sup>+</sup>cen1<sup>inactive</sup></i> , <i>leu1-32</i> , <i>ura4-D18</i>                                                                                                            | This study                                     |
| LM573             | <i>h-</i> , <i>mhf2<sup>+</sup>cen1<sup>inactive</sup></i> , <i>leu1-32</i> , <i>ura4-D18</i>                                                                                                            | This study                                     |
| LM574             | <i>h+</i> , <i>mhf2Δcen1<sup>inactive</sup></i> , <i>leu1-32</i> , <i>ura4-D18</i>                                                                                                                       | This study                                     |
| LM575             | <i>h-</i> , <i>mhf2<sup>+</sup>cen1<sup>inactive</sup></i> , <i>leu1-32</i> , <i>ura4-D18</i>                                                                                                            | This study                                     |
| LM576             | <i>h+</i> , <i>mhf2Δcen1<sup>inactive</sup></i> , <i>leu1-32</i> , <i>ura4-D18</i>                                                                                                                       | This study                                     |
| LM586             | <i>h?</i> , <i>mhf2<sup>+</sup>cen1<sup>inactive</sup></i> , <i>leu1-32</i> , <i>ura4-D18</i>                                                                                                            | This study                                     |
| LM587             | <i>h-</i> , <i>mhf2Δcen1<sup>inactive</sup></i> , <i>leu1-32</i> , <i>ura4-D18</i>                                                                                                                       | This study                                     |
| LM588             | <i>h-</i> , <i>mhf2<sup>+</sup>cen1<sup>inactive</sup></i> , <i>leu1-32</i> , <i>ura4-D18</i>                                                                                                            | This study                                     |
| LM1133            | <i>h?</i> , <i>mhf2<sup>+</sup>cen1<sup>active</sup></i> , <i>leu1-32</i> , <i>ura4-D18</i>                                                                                                              | This study                                     |
| LM1134            | <i>h?</i> , <i>mhf2<sup>+</sup>cen1<sup>active</sup></i> , <i>leu1-32</i> , <i>ura4-D18</i>                                                                                                              | This study                                     |
| LM1122            | <i>h?</i> , <i>mhf2<sup>+</sup>cen1<sup>active</sup></i> , <i>leu1-32</i> , <i>ura4-D18</i>                                                                                                              | This study                                     |
| LM1123            | <i>h?</i> , <i>mhf2<sup>+</sup>cen1<sup>active</sup></i> , <i>leu1-32</i> , <i>ura4-D18</i>                                                                                                              | This study                                     |
| LM1163            | <i>h?</i> , <i>mhf2<sup>+</sup>cen1<sup>active</sup></i> , <i>leu1-32</i> , <i>ura4-D18</i>                                                                                                              | This study                                     |
| LM1168            | <i>h?</i> , <i>mhf2<sup>+</sup>cen1<sup>active</sup></i> , <i>leu1-32</i> , <i>ura4-D18</i>                                                                                                              | This study                                     |
| LM1171            | <i>h?</i> , <i>mhf2<sup>+</sup>cen1<sup>active</sup></i> , <i>leu1-32</i> , <i>ura4-D18</i>                                                                                                              | This study                                     |
| QG40              | <i>h+</i> , <i>cen1-GFP</i>                                                                                                                                                                              | This study                                     |
| QG41              | <i>h-</i> , <i>cen1-GFP</i>                                                                                                                                                                              | This study                                     |
| LM930             | <i>h-</i> , <i>cen1-GFP</i> , <i>mhf2Δcen1<sup>inactive</sup></i>                                                                                                                                        | This study                                     |
| LM934             | <i>h-</i> , <i>cen1-GFP</i> , <i>mhf2<sup>+</sup>cen1<sup>inactive</sup></i>                                                                                                                             | This study                                     |
| LM1031            | <i>h+</i> , <i>cen1-GFP</i> , <i>mhf2<sup>+</sup>cen1<sup>inactive</sup></i>                                                                                                                             | This study                                     |
| LM1243            | <i>h+</i> , <i>cen1-GFP</i> , <i>mhf2<sup>+</sup>cen2<sup>inactive</sup></i>                                                                                                                             | This study                                     |
| LM1244            | <i>h+</i> , <i>cen1-GFP</i> , <i>mhf2<sup>+</sup>cen2<sup>inactive</sup></i>                                                                                                                             | This study                                     |
| LM1246            | <i>h-</i> , <i>cen1-GFP</i> , <i>mhf2<sup>+</sup>cen2<sup>inactive</sup></i>                                                                                                                             | This study                                     |
| LM1247            | <i>h-</i> , <i>cen1-GFP</i> , <i>mhf2<sup>+</sup>cen2<sup>inactive</sup></i>                                                                                                                             | This study                                     |

## SI References

1. Kim D-U, *et al.* (2010) Analysis of a genome-wide set of gene deletions in the fission yeast *Schizosaccharomyces pombe*. *Nature Biotechnology* 28:617.
2. Moreno S, Fau - Klar A, Klar A, Fau - Nurse P, & Nurse P (1991) Molecular genetic analysis of fission yeast *Schizosaccharomyces pombe*. *Methods Enzymol* 194:795-823.
3. Lu M & He X (2018) Ccp1 modulates epigenetic stability at centromeres and affects heterochromatin distribution in *Schizosaccharomyces pombe*. *Journal of Biological Chemistry* 293(31):12068-12080.
4. Pidoux ALR, W. & Allshire RC (2003) Sim4: a novel fission yeast kinetochore protein required for centromeric silencing and chromosome segregation. *J Cell Biol* 161(2):295-307.
5. Joglekar AP, *et al.* (2008) Molecular architecture of the kinetochore-microtubule attachment site is conserved between point and regional centromeres. *J Cell Biol* 181(4):587-594.
6. Yamane K, *et al.* (2011) Asf1/HIRA facilitate global histone deacetylation and associate with HP1 to promote nucleosome occupancy at heterochromatic loci. *Mol Cell* 41(1):56-66.
